# Supplementary material for: Impact of bismuth-doping on enhanced radiative recombination in lead-free double-perovskite nanocrystals
Source: Royal Society of Chemistry journal article supplement (doi:10.1039/d2na00238h), 2022-01-01
Supplement: d2na00238h1.pdf [file d2na00238h1.pdf]

# Impact of Bismuth-Doping on the Enhanced Radiative Recombination in Lead-free Double Perovskite Nanocrystals

*Author name:* Xiaoyu Huang<sup>1,2</sup>, Yoshitaka Matsushita<sup>3</sup>, Hong-Tao Sun,<sup>1</sup> Naoto Shirahata<sup>1,2,4\*</sup>

**Author address:**

<sup>1</sup>International Center for Materials Nanoarchitectonics (MANA), National Institute for Materials Science (NIMS), Ibaraki 305-0044, Japan

<sup>2</sup>Graduate School of Chemical Sciences and Engineering, Hokkaido University, Sapporo 060-0814, Japan; Department of Physics, Chuo University, Tokyo 112-8551, Japan

<sup>3</sup>Research Network and Facility Services Division, National Institute for Materials Science (NIMS), Ibaraki 305-0047, Japan

<sup>4</sup>Department of Physics, Chuo University, Tokyo 112-8551, Japan

Email: SHIRAHATA.Naoto@nims.go.jp

**KEYWORDS:** Lead-free double perovskite, nanocrystal, bismuth doping, photoluminescence

## Supporting Figure

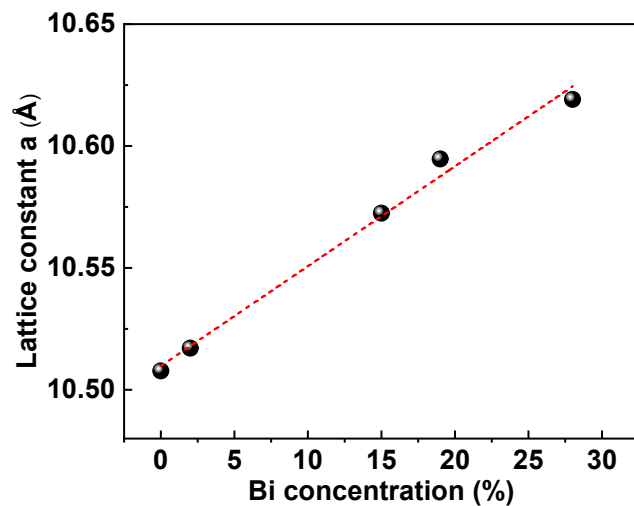

**Figure S1.** The lattice constant as function of Bi concentration in  $\text{Cs}_2\text{Ag}_{0.65}\text{Na}_{0.35}\text{InCl}_6$  NCs. (PLQY: 11.5% for 19% Bi-doped NCs, and 9.3% for 28% Bi-doped NCs.)

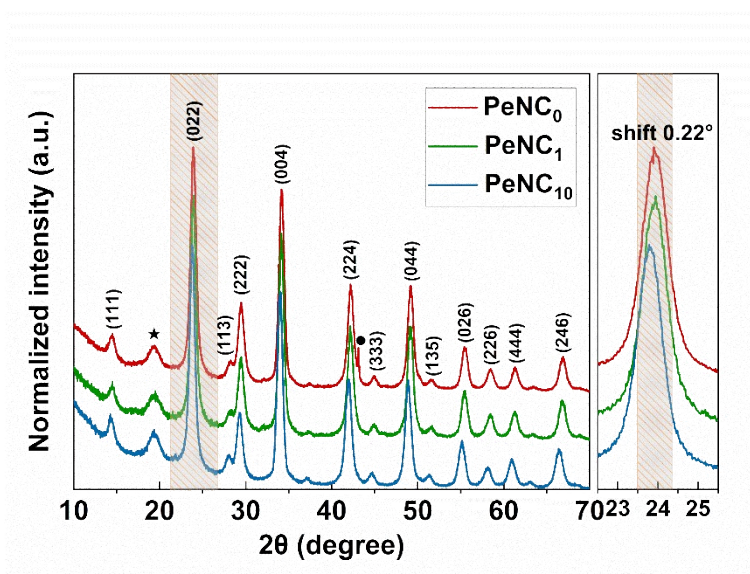

**Figure S2.** XRD patterns of  $\text{PeNC}_0$ ,  $\text{PeNC}_1$  and  $\text{PeNC}_{10}$  measured at 5 K. The peaks indicating as ★ and ● are from the X-ray window materials of the cryostat and from Cu sample holder, respectively.

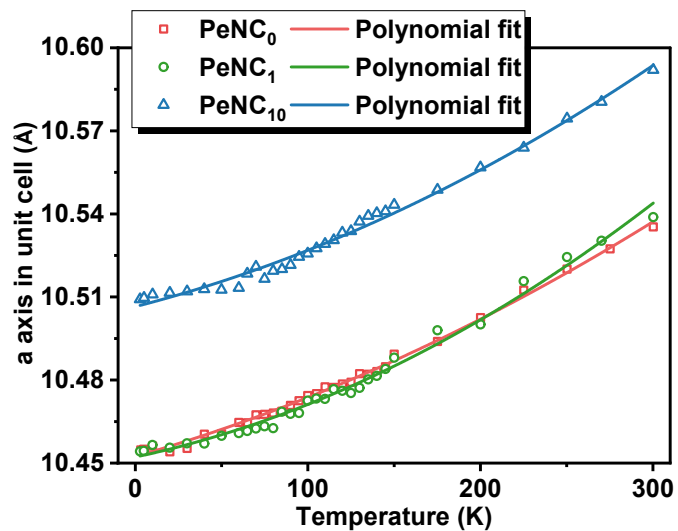

**Figure S3.** Thermal expansion coefficient fitting of PeNC<sub>0</sub>, PeNC<sub>1</sub> and PeNC<sub>10</sub>.

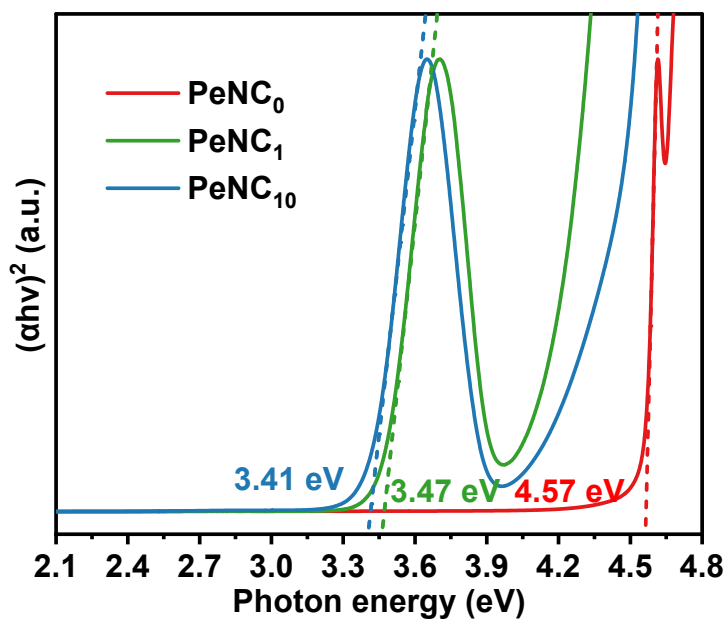

**Figure S4.**  $(\alpha h\nu)^2$ -  $h\nu$  plots of PeNC<sub>0</sub> (red), PeNC<sub>1</sub> (green) and PeNC<sub>10</sub> (blue). The values of  $E_g$  extracted from extrapolations to  $\alpha = 0$ .

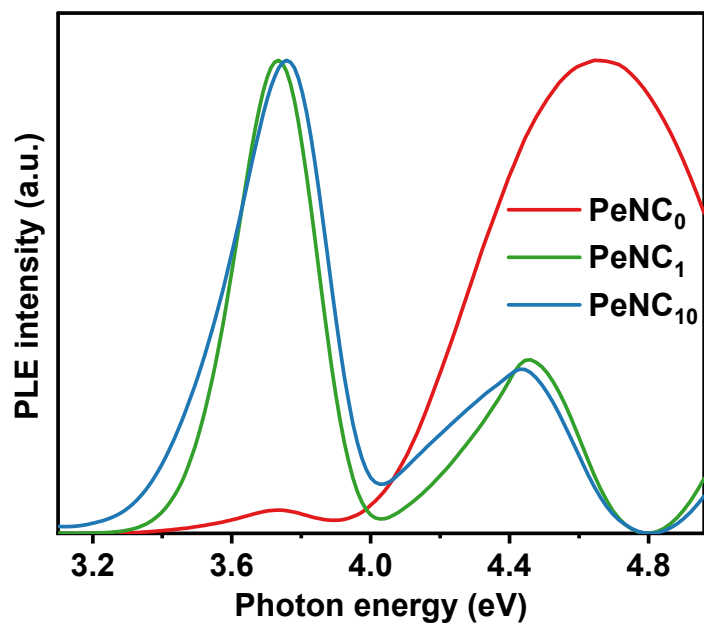

**Figure S5.** Excitation spectra of photoluminescence measured for PeNC<sub>0</sub> (634 nm-emission peak), PeNC<sub>1</sub> (592 nm-emission peak) and PeNC<sub>10</sub> (630 nm-emission peak).

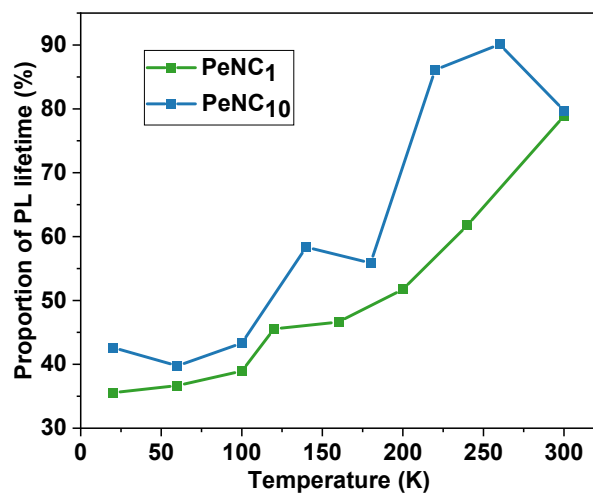

**Figure S6.** The proportion of less-long lived PL lifetime for PeNC<sub>1</sub> (green) and PeNC<sub>10</sub> (blue) dependent on temperature.

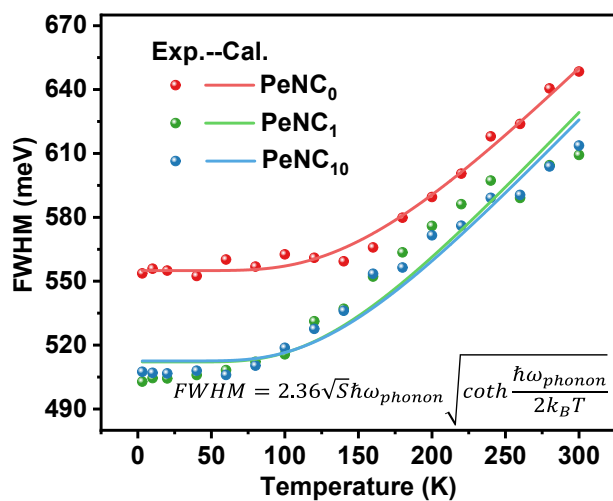

**Figure S7.** Temperature-dependent PL FWHM of PeNC<sub>0</sub>, PeNC<sub>1</sub> and PeNC<sub>10</sub>.

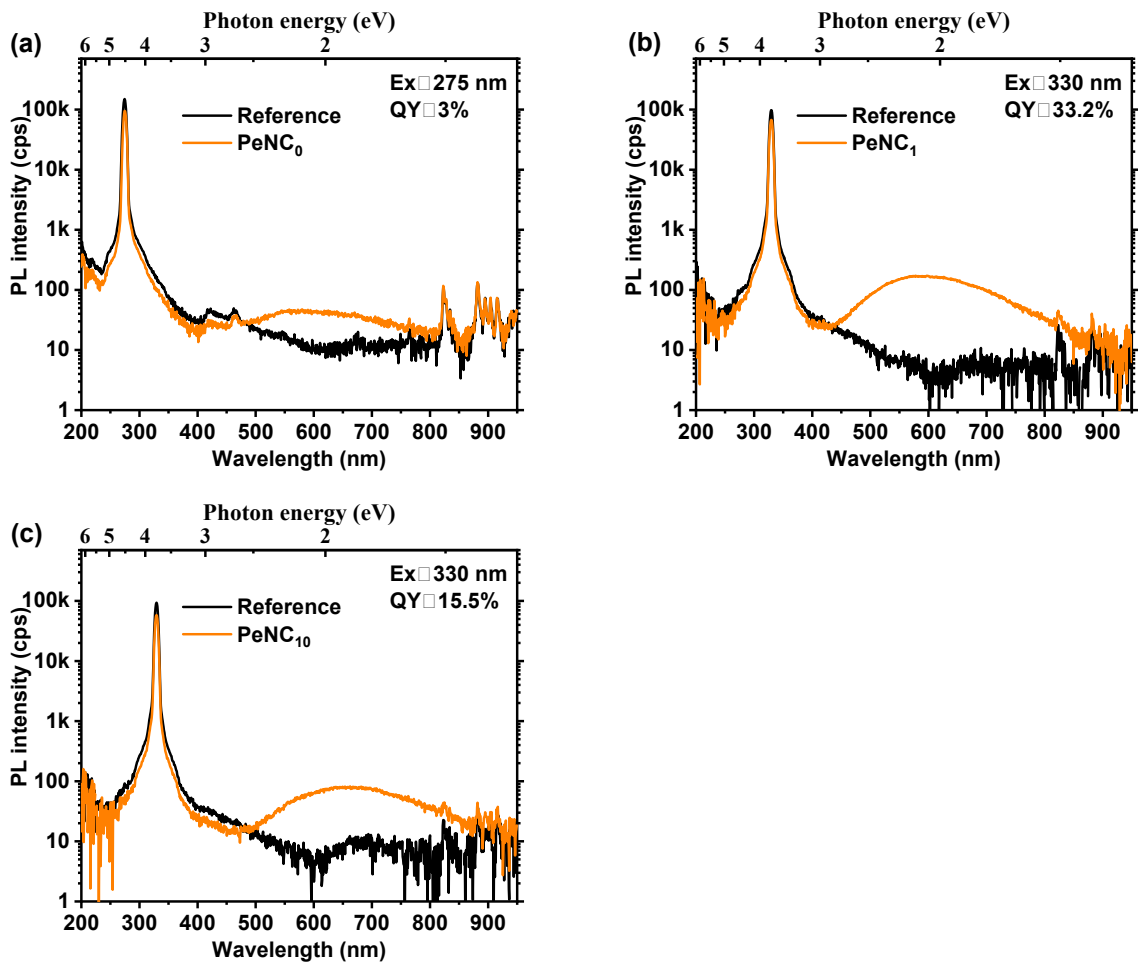

Figure S8. PLQY for PeNC<sub>0</sub> (a), PeNC<sub>1</sub> (b) and PeNC<sub>10</sub> (c).

## Supporting Table

**Table S1.** STEM-EDS elemental analysis on Bi-doped and undoped NCs.

| EDS/atom ratio     | Cs/In | Ag/(Ag+Na) | Na/(Ag+Na) | In/(In+Bi) | Bi/(In+Bi) | Cl/In |
|--------------------|-------|------------|------------|------------|------------|-------|
| PeNC <sub>0</sub>  | 2.32  | 0.66       | 0.35       | 1          | 0          | 5.61  |
| PeNC <sub>1</sub>  | 2.39  | 0.65       | 0.35       | 0.98       | 0.02       | 5.50  |
| PeNC <sub>10</sub> | 2.48  | 0.63       | 0.37       | 0.85       | 0.15       | 4.86  |

**Table S2.** Fitted decay parameters of PeNCs at different temperature.

| Temperature (K)    |                                           | 20             | 60             | 100            | 140                          | 180                          | 220                          | 260                         | 300           |
|--------------------|-------------------------------------------|----------------|----------------|----------------|------------------------------|------------------------------|------------------------------|-----------------------------|---------------|
| PeNC <sub>1</sub>  | $\tau_1$ ( $\mu$ s)<br>(A <sub>1</sub> %) | 3.13<br>(36%)  | 0.97<br>(37%)  | 1.06<br>(39%)  | 1.65<br>(46%)<br>@ 120<br>K  | 0.95<br>(47%)<br>@ 160<br>K  | 1.00<br>(52%)<br>@ 200<br>K  | 1.08<br>(62%)<br>@ 240<br>K | 1.10<br>(79%) |
|                    | $\tau_2$ ( $\mu$ s)<br>(A <sub>2</sub> %) | 50.56<br>(64%) | 17.82<br>(63%) | 16.48<br>(61%) | 17.20<br>(54%)<br>@ 120<br>K | 14.99<br>(53%)<br>@ 160<br>K | 12.14<br>(48%)<br>@ 200<br>K | 9.65<br>(38%)<br>@ 240<br>K | 7.26<br>(21%) |
|                    | R-square                                  | 0.998          | 0.996          | 0.996          | 0.991                        | 0.994                        | 0.992                        | 0.985                       | 0.971         |
| PeNC <sub>10</sub> | $\tau_1$ ( $\mu$ s)<br>(A <sub>1</sub> %) | 2.99<br>(43%)  | 2.19<br>(40%)  | 2.24<br>(43%)  | 3.87<br>(58%)                | 1.92<br>(56%)                | 3.45<br>(86%)                | 1.82<br>(90%)               | 0.81<br>(80%) |
|                    | $\tau_2$ ( $\mu$ s)<br>(A <sub>2</sub> %) | 43.52<br>(57%) | 19.27<br>(60%) | 18.16<br>(57%) | 19.52<br>(42%)               | 13.51<br>(44%)               | 19.70<br>(14%)               | 12.50<br>(10%)              | 3.53<br>(20%) |
|                    | R-square                                  | 0.999          | 0.998          | 0.997          | 0.993                        | 0.994                        | 0.975                        | 0.978                       | 0.999         |
